# Supplementary material for: Sensitive detection of the okadaic acid marine toxin in shellfish by Au@Pt NPs/horseradish peroxidase dual catalysis immunoassay
Source: Royal Society of Chemistry journal article supplement (doi:10.1039/d1ay01973b), 2022-01-01
Supplement: d1ay01973b1.pdf [file d1ay01973b1.pdf]

## Electronic Supporting Information

### 1 Experimental

#### 1.1 Materials and reagents

Okadaic acid (OA), Domoic acid (DA), mefenamic acid (MEF), Tetrodotoxin (TTX), Tetrabromobisphenol A (TBBPA), Keyhole limpet hemocyanin (KLH), Bovine serum albumin (BSA), Ovalbumin (OVA), horseradish peroxidase (HRP) conjugated goat anti-mouse IgG antibody were obtained from Sigma-Aldrich, USA. Sodium citrate tribasic dehydrate (Shanghai Titan chem. Co., Ltd., Shanghai, China), L-ascorbic acid (Aladdin industrial corporation, Shanghai, China), chloroauric acid tetra hydrate ( $\text{HAuCl}_4 \cdot 4\text{H}_2\text{O}$ , 48-50% Aubasis) and potassium tetrachloroplatinate (Shanghai Macklin Biochemical Co., Ltd.), 3,3',5,5'-tetramethylbenzidine (TMB, Aladdin industrial corporation, Shanghai, China), and polystyrene microplates (Costar, Corning Inc., New York, USA) were used without pretreatment.

Coating buffer: 50 mM sodium carbonate, pH 9.6; Blocking buffer: 10 mM PBS including 1wt% BSA, pH 7.4; Washing buffer: 10 mM PBS including 0.5 wt% Tween 20, pH 7.4.

#### 1.2 Methods

##### 1.2.1 Test of hybridoma cells

The binding activities of hybridoma cells were tested by ic-ELISA. A 96-well plate was coated with OA-BSA antigen (5  $\mu\text{g}/\text{mL}$ , 100  $\mu\text{l}/\text{well}$ ) in 0.05 M carbonate/bicarbonate buffer (pH 9.60) overnight at 4°C. After the coating procedure, the plates were washed 3 times with phosphate buffer solution (1×PBS), and then blocked with PBS-milk solution (PBSM, the content of milk was 5%, 200  $\mu\text{L}/\text{well}$ ) at 37°C for 2 h.

The wells were washed three times with tween 20 (0.1%)-phosphate buffer and 1×PBS. The cell supernatant was diluted in PBSM and incubated at 37°C for 1 h. After washing, HRP-labeled goat anti-mouse IgG (1:8000 diluted by 5% PBSM, 100  $\mu\text{L}/\text{well}$ ) was added and incubated at 37°C for 1 h. Clean the well and a 100  $\mu\text{L}$  substrate solution was added into each well at 37°C for 10 min. Finally, the reaction was stopped by 2 M  $\text{H}_2\text{SO}_4$  (50  $\mu\text{L}/\text{well}$ ), and the value of optical density (OD) was measured at 450 nm.

##### 1.2.2 Affinity determination of McAb

According to the method of Beatty (Beatty et al, 1987) and Dai (Dai, et al, 2003), the affinity constant  $K_{\text{aff}}$  was determined by iELISA. This method for the estimation of  $K_{\text{aff}}$  is simple, rapid, and reliable. Simply, OA-BSA antigens with different concentrations were coated in the enzyme-labeled wells, and blocked with 5% PBSM buffer solution. The anti-OA monoclonal antibody was doubling diluted and prepared

in different concentrations, then added to the enzyme-labeled wells and incubated at 37°C for 1 h.

According to the following formula, the affinity constant ( $K_{aff}$ ) was calculated.

$$K_{aff} = (n-1)/\{2(n [Ab_2]-[Ab_1])\},$$

Where  $[Ag]$  was concentration of coated antigen,  $[Ab_1]$  and  $[Ab_2]$  represent the different McAb concentrations required to achieved 50% of the  $OD_{max}$  at two different concentrations of coated antigen ( $[Ag_1] = n [Ag_2]$ ), and  $n = [Ag_1] / [Ag_2]$ .

#### References:

- [1] J. D. Beatty, B. G. Beatty, W. G. Vlahos. J Immunol Methods. 100(1987) 173.
- [2] H. Dai, H. Gao, X. Zhao, L. Dai, X. Zhang, N. Xiao, R. Zhao, S. M. Hemmingsen, J Immunol Methods. 279 (2003) 267.

#### 1.2.3 Specificity determination of McAb

According to the ref. [Talanta, 2021, 228, 122215], the cross-reactivity of McAb against OA to domoic acid (DA), sea snake venoms (SN311), tetrodotoxin (TTX), and mixed interferences were determined by the icELISA. Here, SN311 at 10 ng/mL, DA at 300 ng/mL and TTX at 1.0 ng/mL were spiked in the reagent buffer. OA was spiked at 1, 4 and 15 ng/mL. Interference from L-glutamic acid (usually present in shellfish tissue), mefenamic acid (MEF) and tetrabromobisphenol A (2,3-dibromopropyl) ether (TBBPA) was also tested. Mix Interf. was a mixture of L-glutamic acid, mefenamic acid (MEF) and tetrabromobisphenol A (2,3-dibromopropyl) ether (TBBPA) at 10 µg/mL per compound. The mixed solutions with different combinations were added to each well of OA-BSA coated plate. The plate was incubated at 37°C for 1 h.

#### 1.2.4 Detection procedure of OA

The OA-BSA antigen was diluted with carbonate coating buffer according to the optimal antigen coating concentration, and injected into the high-binding 96-well microplate at 100µL each well and incubating overnight at 4°C. The microplate was then rinsed 3 times with washing buffer (200 µL perwell) and blocked with blocking buffer (200 µL perwell) with an incubation for 2 h at 4°C. the obtained OA-BSA antigen coated microplate was rinsed 3 times with washing buffer (200 µL perwell).

A 100 µL OA standard solution was mixed with Au@Pt-McAb at the ration of 1:1, and maintained at 37 °C for 1 h. Then the obtained solution was added into the microplate (100 µL perwell) and incubated at 37 °C for 1 h. After washing with washing buffer for 3 times (200 µL perwell each time), the horseradish peroxidase (HRP) conjugated goat anti-mouse IgG antibody Diluted in a certain proportion was added into the above microplate (100 µL perwell), and reacted at 37 °C for 60 min.

After washing for 3 times (200  $\mu$ L perwell each time), TMB substrate (100  $\mu$ L) was added into each well, and incubated for 15 min at 37  $^{\circ}$ C. Finally, the catalytic reaction was stopped by using H<sub>2</sub>SO<sub>4</sub> (50  $\mu$ L, 2M). The absorbance was recorded at 450 nm using a microplate reader (SYNERGYH1, BioTek.).

## Supporting data:

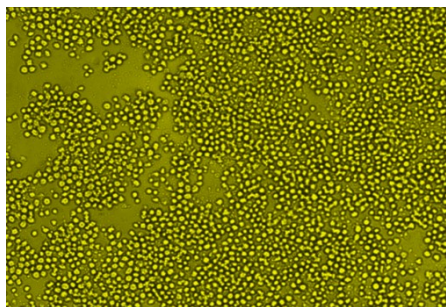

Fig. S1 The picture of Hybridoma cells

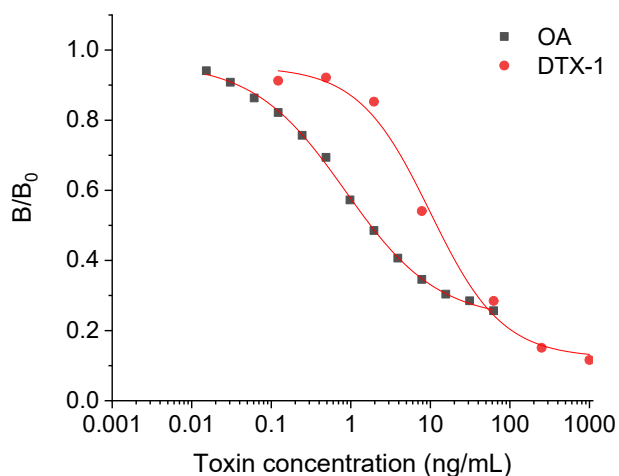

Fig. S2 Binding curve for OA and DTX-1 detection of ic-ELISA with Au@Pt-McAb composites  
DTX-1:  $R^2=0.98$ ,  $IC_{50}=9.95$  ng mL<sup>-1</sup>; OA:  $R^2=0.99$ ,  $IC_{50}=0.87$  ng mL<sup>-1</sup>.  
Cross-reactivity =  $(([IC_{50}] \text{ for OA}) / ([IC_{50}] \text{ for DTX})) * 100\% = 8.7\%$

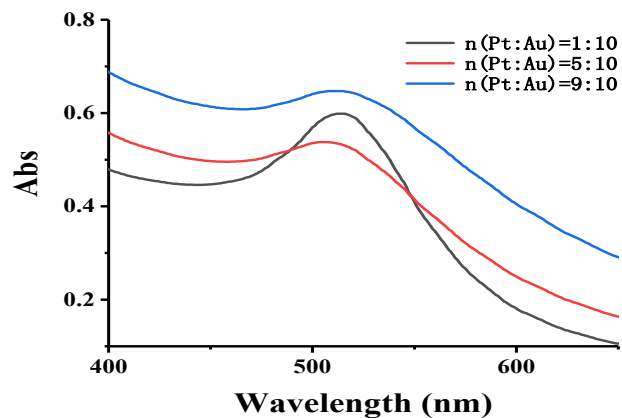

Fig. S3 UV-vis spectra scanning of Au@Pt NPs with different mole ratios

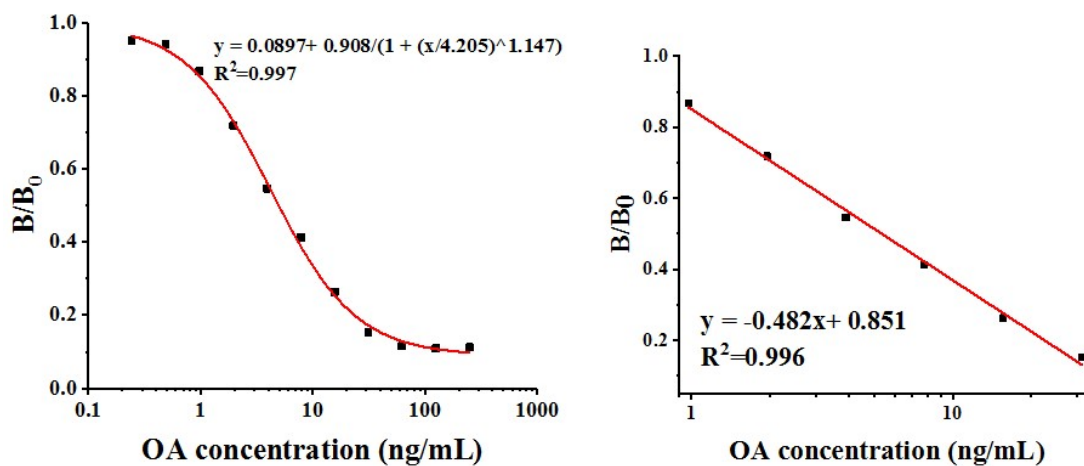

Fig. S4 The calibration curve for OA detection of ic-ELISA with HRP .

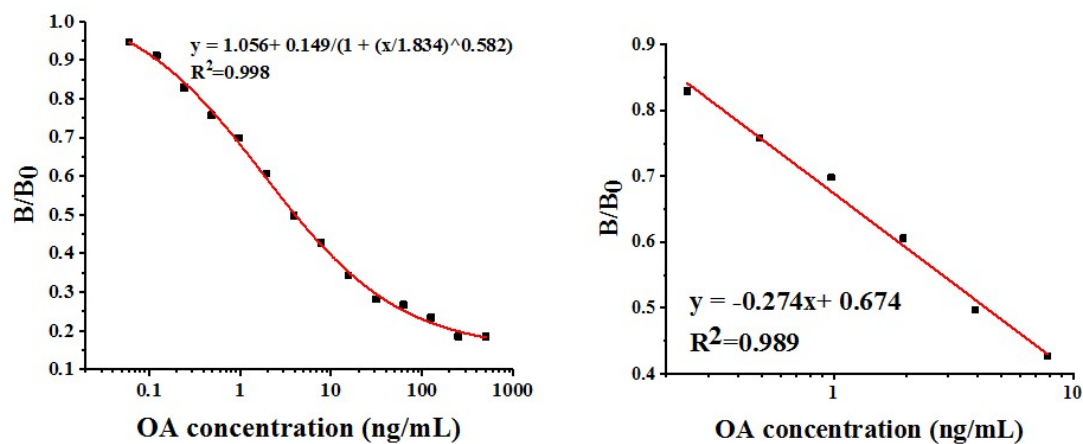

Fig. S5 The calibration curve for OA detection of ic-ELISA with AuNPs@HRP

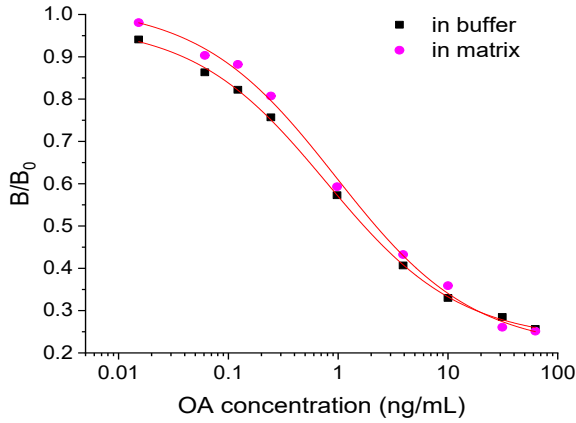

Fig. S6 ic-ELISA for OA in buffer or in matrix

Table S1 Post-hoc analyses of a one-way ANOVA for catalytic activity of Au@Pt-McAb

Tests for between-subject effects

Dependent variable: catalytic activity indicated as OD450nm

| Source                       | Type III sum of squares | df       | Mean square  | F            | Sig.         |
|------------------------------|-------------------------|----------|--------------|--------------|--------------|
| Corrected model              | 0.429 <sup>a</sup>      | 2        | 0.214        | 6.907        | 0.028        |
| Intercept                    | 23.792                  | 1        | 23.792       | 766.192      | 0.000        |
| <u>Au@Pt-McAb composites</u> | <u>0.429</u>            | <u>2</u> | <u>0.214</u> | <u>6.907</u> | <u>0.028</u> |
| Error                        | 0.186                   | 6        | 0.031        |              |              |
| Total                        | 24.407                  | 9        |              |              |              |
| Corrected total              | 0.615                   | 8        |              |              |              |

a. R square = 0.697 ( Adjusted R square = 0.596 )

F = 6.907, P ( Sig. = 0.028 ) < 0.05, that is significant at the 0.05 level.

Multiple comparisons

Dependent variable: catalytic activity indicated as OD450nm

|     | (I) group-i | (J) group-j | mean difference (I-J) | standard error | Sig.  | 95% confidence interval |             |
|-----|-------------|-------------|-----------------------|----------------|-------|-------------------------|-------------|
|     |             |             |                       |                |       | lower limit             | upper limit |
| LSD | 1           | 2           | -0.39800*             | 0.143879       | 0.033 | -0.75006                | -0.04594    |
|     |             | 3           | 0.11033               | 0.143879       | 0.472 | -0.24173                | 0.46239     |
|     | 2           | 1           | 0.39800*              | 0.143879       | 0.033 | 0.04594                 | 0.75006     |
|     |             | 3           | 0.50833*              | 0.143879       | 0.012 | 0.15627                 | 0.86039     |

|   |   |           |          |       |          |          |
|---|---|-----------|----------|-------|----------|----------|
| 3 | 1 | -0.11033  | 0.143879 | 0.472 | -0.46239 | 0.24173  |
|   | 2 | -0.50833* | 0.143879 | 0.012 | -0.86039 | -0.15627 |

Based on the observed mean. Error term is mean squared (error) = 0.031。

\*. Differences in means are significant at the 0.05 level.

Table S2 The optimal matching concentrations of coating and Au@Pt NPs-McAb

| Dilution factors<br>of Au@Pt NPs-<br>McAb | Dilution factors of OA-BSA |       |        |        |        |
|-------------------------------------------|----------------------------|-------|--------|--------|--------|
|                                           | 1/400                      | 1/800 | 1/1600 | 1/3200 | 1/6400 |
| 1/10                                      | 2.342                      | 2.609 | 2.474  | 2.400  | 2.290  |
| 1/20                                      | 2.324                      | 2.454 | 2.363  | 2.362  | 2.186  |
| 1/40                                      | 2.282                      | 2.343 | 2.227  | 2.336  | 2.056  |
| 1/80                                      | 2.168                      | 2.187 | 2.089  | 1.083  | 1.866  |
| 1/160                                     | 1.722                      | 1.777 | 1.765  | 1.713  | 1.480  |
| 1/320                                     | 1.504                      | 1.439 | 1.202  | 1.209  | 0.968  |
| 1/640                                     | 1.195                      | 1.037 | 0.923  | 0.816  | 0.627  |
| 1/1280                                    | 0.813                      | 0.735 | 0.707  | 0.569  | 0.440  |

Table S3 The comparison with ELISA methods reported for OA detection

| Detection methods | IC <sub>50</sub> (ng/mL) | IC <sub>10</sub> (ng/mL) | Ref. |
|-------------------|--------------------------|--------------------------|------|
| ic-ELISA          | 0.33                     | 0.06                     | [8]  |
| ic-ELISA          | 4.40                     | 0.45                     | [9]  |
| ic-ELISA          | 0.98                     | 0.18                     | [37] |
| c-ELISA           | 2.07                     | 0.6                      | [37] |

|                               |      |      |           |
|-------------------------------|------|------|-----------|
| ic-ELISA                      | 22.4 | 7.4  | [38]      |
| AuNPs synergistic ic-ELISA    | 1.83 | 0.12 | This work |
| Pt@AuNPs synergistic ic-ELISA | 0.87 | 0.04 | This work |

### References:

- [8] A. Sassolas, G. Catanante, A. Hayat, L. D.Stewart, C. T.Elliott, J. LouisMarty, Food Control, 2013, 30,144.
- [9] S. Y. Lu, Y. Zhou, Y. S. Li, C. Lin, X. M. Meng, D. M. Yan, Z. H. Li, S. Y. Yu, Z. S. Liu, H. L. Ren. Environ Sci Pollut Res Int, 2011, 19(7):2619
- [37] S. Y. Lu, Y. Zhou, Y. S. Li, H. L. Ren, F.Z. Huo, Y. Wang, Z.S. Liu, G. Yu. Chin. J. Vet. Sci, 2007, 27: 336.
- [38] M.L. Berre, M. Kilcoyne, M. Kane, Toxicon,2015, 103,169.
